# Supplementary material
Source: publisher figshare collection journal article supplement (https://plos.figshare.com/articles/dataset/_/120507)

**Figure S1:** *daf-2* L1s have an increased survival span compared to wild type (+) at 25 °C (a non-permissive temperature) (A) and a slightly increased survival span at 22.5 °C (B). At a permissive temperature (15 °C), however, there is no difference between *daf-2* and wild type (C). The results are representative of three independent experiments. \*\*\*  $p < 0.001$ , NS: not significant.

**A. 25 °C**

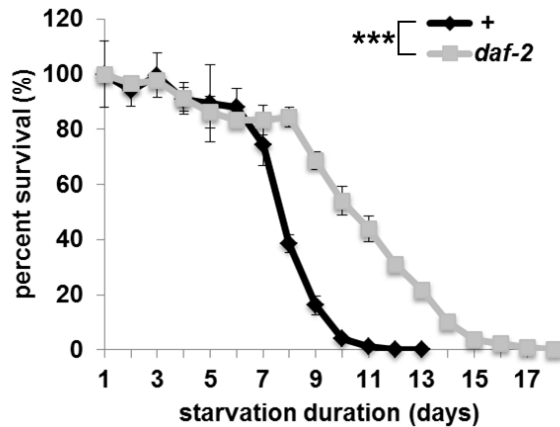

**B. 22.5 °C**

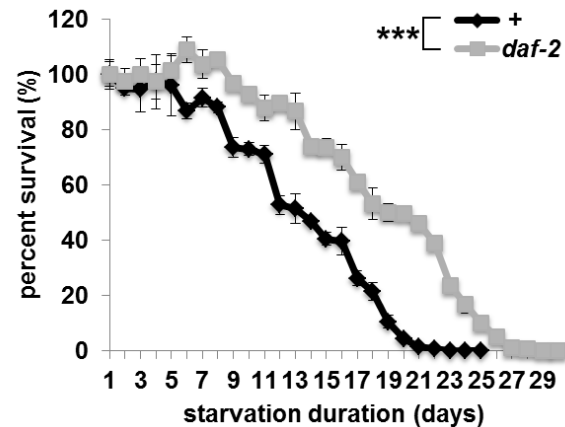

**C. 15 °C**

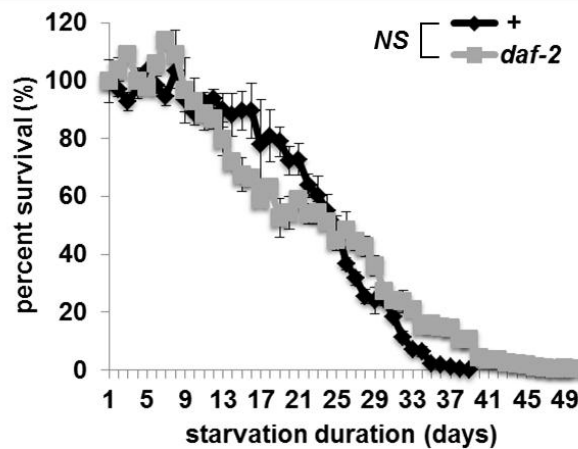

Supplement: Supplementary file 1 [file 1 › Figure_S1.pdf]
