# Supplementary material
Source: publisher figshare collection journal article supplement (https://plos.figshare.com/articles/dataset/_/120507)

**Figure S2:** Two mutants in the insulin pathway, *daf-16* L1s and *daf-18* L1s have a short survival span compared to wild type (+). The experiments were performed at room temperature (approximately at 22.5 °C). The results are representative of three independent experiments. \*\*\*  $p < 0.001$

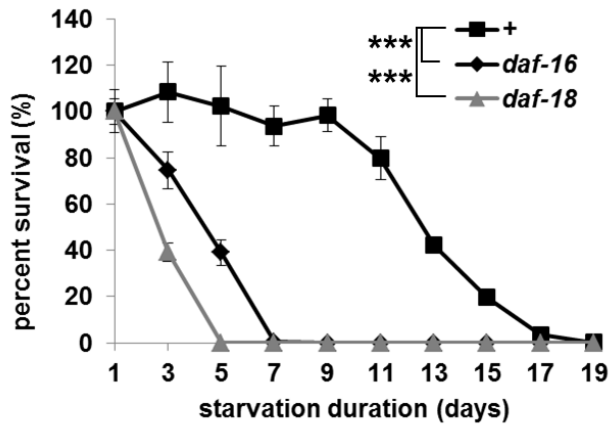

Supplement: Supplementary file 1 [file 1 › Figure_S2.pdf]
