# Supplementary material
Source: publisher figshare collection journal article supplement (https://plos.figshare.com/articles/dataset/_/120507)

**Figure S3:** *daf-7* mutants have normal L1 longevity at 15 °C and at 22.5 °C. The results are representative of three independent experiments. NS: not significant.

**A. 15 °C**

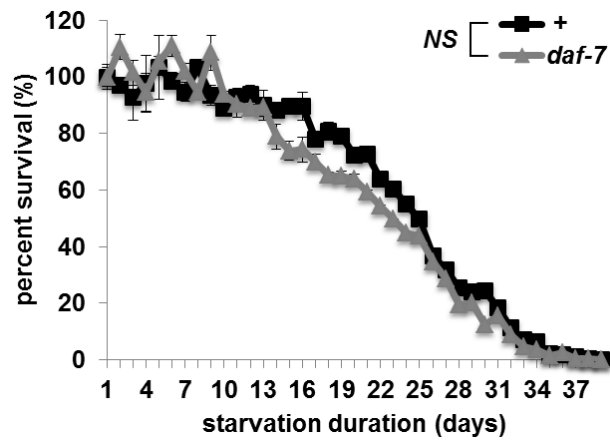

**B. 22.5 °C**

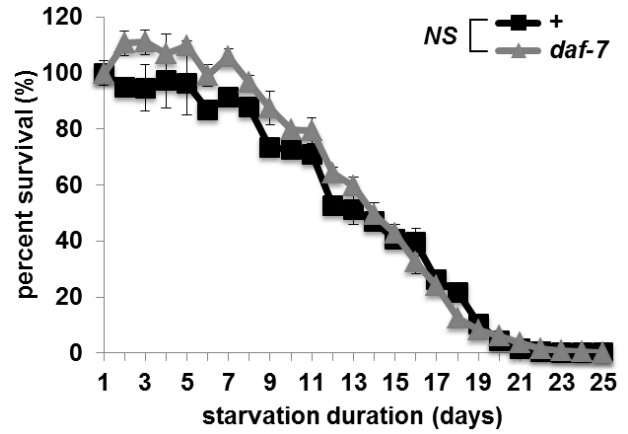

Supplement: Supplementary file 1 [file 1 › Figure_S3.pdf]
