# Supplementary material
Source: publisher figshare collection journal article supplement (https://plos.figshare.com/articles/dataset/_/120507)

**Figure S5:** *ife-2* mutants have increased L1 longevity. The experiments were performed at 22.5 °C. The results are representative of three independent experiments. \*\*\*  $p < 0.001$

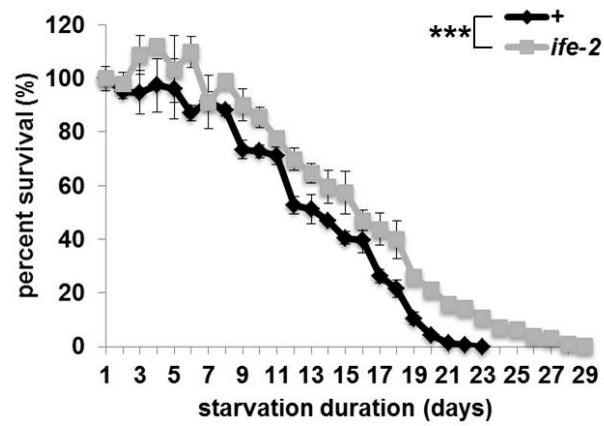

Supplement: Supplementary file 1 [file 1 › Figure_S5.pdf]
