# Supplementary material
Source: publisher figshare collection journal article supplement (https://plos.figshare.com/articles/dataset/_/120507)

**Figure S6:** A *daf-2* mutation partially rescued the L1 longevity phenotype of *aak-2* mutants. The experiments were performed at 25 °C, a non-permissive temperature for *daf-2*. The results are representative of three independent experiments. \*\*\*  $p < 0.001$

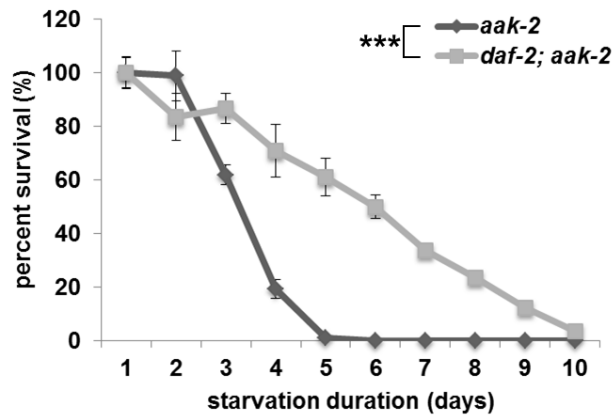

Supplement: Supplementary file 1 [file 1 › Figure_S6.pdf]
