# Supplementary material
Source: publisher figshare collection journal article supplement (https://plos.figshare.com/articles/dataset/_/120507)
Supplement: Supplementary file 1 [file 1 › Table_S1.pdf]

**Table S1**

| starvation days | number of progeny                |                                                        |
|-----------------|----------------------------------|--------------------------------------------------------|
|                 | from mothers with damaged gonads | from mothers with normal gonads or less damaged gonads |
| 1               | N/A                              | 272 ± 8.15***                                          |
| 9               | 1.67 ± 1.04***                   | 141.4 ± 20.41***                                       |

**Table S1:** Post-starvation damage in gonads results in reduced brood size.

9 days of starvation as L1 induces gonad damage once L1s grow to adults and results in reduced brood size. For each group 15 mothers were tested (see Materials and Methods for detail). Numbers are mean ± S.E.M. All three results are statistically different from each other.

\*\*\*  $p < 0.001$  (Mann-Whitney U Test)
