# Supplementary material
Source: publisher figshare collection journal article supplement (https://plos.figshare.com/articles/dataset/_/120507)
Supplement: Supplementary file 1 [file 1 › Table_S2.pdf]

**Table S2**

| genotypes            | young adults | ≤ L4s | total |
|----------------------|--------------|-------|-------|
| +                    | 119          | 59    | 178   |
| <i>aak-2 (rr48)</i>  | 0            | 205   | 205   |
| <i>aak-2 (ok524)</i> | 0            | 286   | 286   |

**Table S2:** After 5 days of starvation as L1, *aak-2* mutants develop slower than wild type. L1s were starved for 5 days then fed to grow. After 52 hours of feeding, the gonad development was used to confirm adulthood. Neither of two different *aak-2* alleles reached adulthood after 52 hours of feeding from L1s, whereas about 67% of wild type reached adulthood. The result is representative of three independent experiments.

## Reference:
